# Supplementary material
Source: PubMed Central journal article supplement (PMC4014965)
Supplement: jdi-2-262-s1.pdf [file jdi-2-262-s1.pdf]

# Supplemental figure

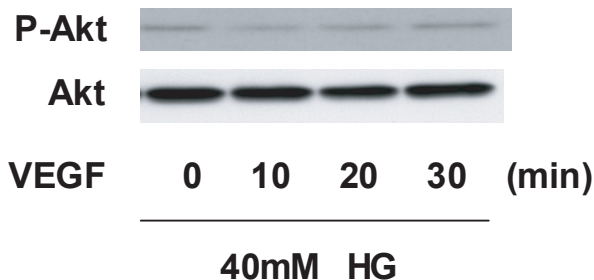

**Supplemental figure** The phosphorylation of Akt stimulated by VEGF under 40mM high glucose condition. Confluently-grown EPCs in 6-well multiplates were cultured with Medium 199 containing 40 mM glucose (40mM HG) for 72 hours. After the starvation with 0.5% FBS for 24 h, EPCs were cultured with VEGF (25 ng/ml) for the indicated time. One of three experiments with similar results is shown.
